# Supplementary material for: Versatile, mild, and selective reduction of various carbonyl groups using an electron-deficient boron catalyst
Source: Royal Society of Chemistry journal article supplement (doi:10.1039/c6ob00127k), 2016-01-01

## Versatile, mild, and selective reduction of various carbonyl groups using an electron-deficient boron catalyst

Katherine M. Lucas, Adam F. Kleman, Luke R. Sadergaski, Caitlyn L. Jolly, Brady S. Bollinger, Brittany L. Mackesey, and Nicholas A. McGrath\*

### Table of Contents

|                                                                |          |
|----------------------------------------------------------------|----------|
| 1. General Methods                                             | S1       |
| 2. Experimental Procedures and Tabulated Characterization Data | S1 – S7  |
| 3. <sup>1</sup> H-NMR and <sup>13</sup> C NMR Spectra          | S8 – S20 |

### 1. General Methods

Reagent chemicals were obtained from commercial sources and used without further purification. Flash chromatography was performed with columns of 40–63 Å silica gel, 230–400 mesh (Silicycle, Québec City, Canada). Thin-layer chromatography (TLC) was performed on plates of EMD 250-µm silica 60-F<sub>254</sub>. The phrase “concentrated under reduced pressure” refers to the removal of solvents and other volatile materials using a rotary evaporator while maintaining the water-bath temperature below 40 °C. Residual solvent was removed from samples at high vacuum (<0.1 torr). The term “high vacuum” refers to vacuum achieved by mechanical a belt-drive oil pump. All NMR spectra were acquired at ambient temperature with a Bruker Ultra Shield Plus 400, and were referenced to TMS or a residual protic solvent.

Electrospray ionization (ESI) mass spectrometry for small-molecule characterization was performed with a Micromass LCT at the Mass Spectrometry Facility in the Department of Chemistry at the University of Wisconsin–Madison. {NIH 1S100D020022-1}

### 2. Experimental Procedures and Characterization Data

#### 4-Methoxytoluene

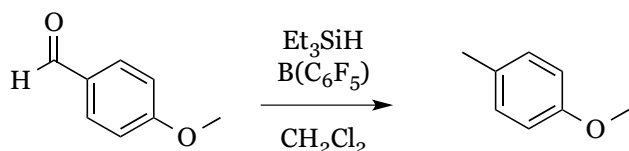

*p*-Anisaldehyde (0.055 g, 0.409 mmol) was dissolved in dichloromethane (4.1 mL) in a scintillation vial. Triethylsilane (0.19 mL, 1.227 mmol) was then added followed by tris(pentafluorophenyl)borane (0.021 g, 0.0409 mmol). The reaction was allowed to stir for 8 hours before being concentrated under reduced pressure and purified by flash chromatography to yield 4-Methoxytoluene (0.039 g, 79%).

<sup>1</sup>H NMR (400 MHz, CDCl<sub>3</sub>) δ 7.01 (d, *J* = 8.3 Hz, 2H), 6.74 (d, *J* = 8.3 Hz, 1H), 3.78 (s, 3H), 2.27 (s, 3H).

\*Checked against Sigma-Aldrich: <http://www.sigmaaldrich.com/spectra/fnmr/FNMR001412.PDF>

#### 4-Ethylanisole

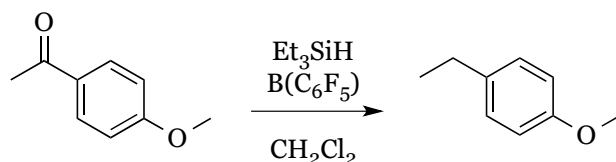

*p*-Methoxyacetophenone (0.061 g, 0.409 mmol) was dissolved in dichloromethane (4.1 mL) in a scintillation vial. Triethylsilane (0.19 mL, 1.227 mmol) was then added followed by tris(pentafluorophenyl)borane (0.021 g, 0.0409 mmol). The reaction was allowed to stir for 8 hours before being concentrated under reduced pressure and purified by flash chromatography to yield 4-Ethylanisole (0.042 g, 75%).

$^1\text{H NMR}$  (400 MHz,  $\text{CDCl}_3$ )  $\delta$  7.12 (d,  $J = 8.6$  Hz, 2H), 6.83 (d,  $J = 8.6$  Hz, 2H), 3.79 (s, 3H), 2.59 (q,  $J = 7.6$  Hz, 2H), 1.21 (t,  $J = 7.6$  Hz, 3H). \*Checked against: Wang, B., Sun, H., Sun, Z., *Eur. J. Org. Chem.* **2009**, 22, 3688-3692.

### 2-Methoxy-4-methylphenol

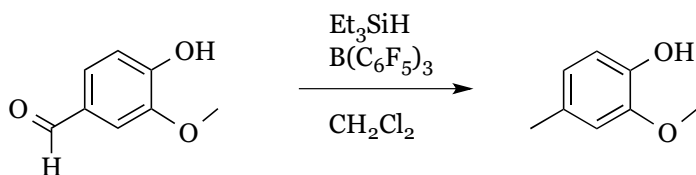

Vanillin (0.062 g, 0.409 mmol) was dissolved in dichloromethane (4.1 mL) in a scintillation vial. Triethylsilane (0.13 mL, 0.818 mmol) was then added followed by tris(pentafluorophenyl)borane (0.021 g, 0.0409 mmol). The reaction was allowed to stir for 8 hours before being concentrated under reduced pressure and purified by flash chromatography to yield 2-Methoxy-4-methylphenol (0.044 g, 78%).

$^1\text{H NMR}$  (400 MHz,  $\text{CDCl}_3$ )  $\delta$  6.81 (d,  $J = 7.8$  Hz, 1H), 6.70 – 6.61 (m, 3H), 5.42 (s, 1H), 3.87 (s, 3H), 2.29 (s, 3H). \*Checked against Sigma-Aldrich: <http://www.sigmaaldrich.com/spectra/fnmr/FNMR006218.PDF>

### 4-Trifluoromethyl-N-ethylaniline

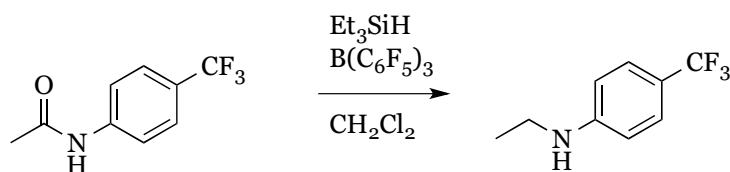

4-Trifluoromethylacetanilide (0.083 g, 0.409 mmol) was dissolved in dichloromethane (4.1 mL) in a scintillation vial. Triethylsilane (0.2 mL, 1.227 mmol) was then added followed by tris(pentafluorophenyl)borane (0.021 g, 0.0409 mmol). The reaction was allowed to stir for 8 hours before being concentrated under reduced pressure and purified by flash chromatography to yield 4-Trifluoromethyl-N-ethylaniline (0.070 g, 91%).

$^1\text{H NMR}$  (400 MHz,  $\text{CDCl}_3$ )  $\delta$  7.39 (d,  $J = 8.1$  Hz, 2H), 6.58 (d,  $J = 8.1$  Hz, 2H), 3.89 (bs, 1H), 3.25 – 3.12 (m, 2H), 1.27 (t,  $J = 7.2$  Hz, 3H).  $^{13}\text{C NMR}$  (101 MHz,  $\text{CDCl}_3$ )  $\delta$  150.7, 126.6 (q,  $J = 3.9$  Hz), 125.0 (q,  $J = 270.4$  Hz), 118.5 (q,  $J = 32.6$  Hz), 111.7, 38.0, 14.6. \*Corrected  $^{13}\text{C-NMR}$  spectral data from incorrect data in: Sajiki, H. *Org. Lett.* **2004**, 6, 4977-4980. Authors might not have realized that F is a spin active nucleus

### 4-Methoxy-N-ethylaniline

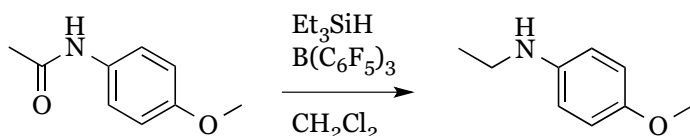

4-Methoxy-N-Acetylaniline (0.067 g, 0.409 mmol) was dissolved in dichloromethane (4.1 mL) in a scintillation vial. Triethylsilane (0.20 mL, 1.227 mmol) was then added followed by tris(pentafluorophenyl)borane (1.050 g, 0.204 mmol). The reaction was allowed to stir for 8 hours before being concentrated under reduced pressure and purified by flash chromatography to yield 4-Methoxy-N-ethylaniline (0.051 g, 82%).

$^1\text{H NMR}$  (400 MHz,  $\text{CDCl}_3$ )  $\delta$  6.79 (d,  $J = 8.9$  Hz), 6.63 (d,  $J = 8.9$  Hz), 3.76, 3.12 (q,  $J = 7.1$  Hz), 1.23 (t,  $J = 7.1$  Hz).  $^{13}\text{C NMR}$  (101 MHz,  $\text{CDCl}_3$ )  $\delta$  153.0, 140.9, 115.2, 115.0, 55.9, 40.38, 14.6. \*Checked against: Nacario, R., Kotakonda, S., Fouchard, D. M. D., Tillekeratne, L. M. V., Hudson, R. A. *Org. Lett.* **2005**, *7*, 471-474.

---

#### 4-Trifluoromethoxy-N-ethylaniline

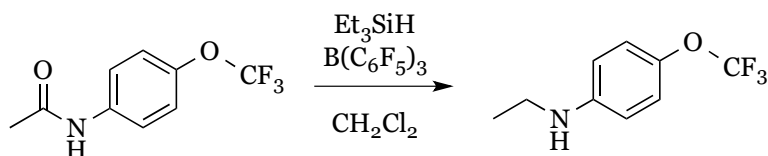

4-(Trifluoromethoxy)-N-Acetylaniline (0.086 g, 0.409 mmol) was dissolved in dichloromethane (4.1 mL) in a scintillation vial. Triethylsilane (0.20 mL, 1.227 mmol) was then added followed by tris(pentafluorophenyl)borane (0.021 g, 0.0409 mmol). The reaction was allowed to stir for 8 hours before being concentrated under reduced pressure and purified by flash chromatography to yield 4-Trifluoromethoxy-N-ethylaniline (0.054 g, 87%).

$^1\text{H NMR}$  (400 MHz,  $\text{CDCl}_3$ )  $\delta$  7.03 (d,  $J = 9.0$  Hz, 2H), 6.55 (d,  $J = 9.0$  Hz, 2H), 3.61 (bs, 1H), 3.17 – 3.09 (m, 2H), 1.26 (t,  $J = 7.1$  Hz, 3H).  $^{13}\text{C NMR}$  (101 MHz,  $\text{CDCl}_3$ )  $\delta$  147.2, 140.2, 122.4, 120.7 (q,  $J = 255.6$  Hz), 112.8, 38.6, 14.8.

---

#### N-Ethylaniline

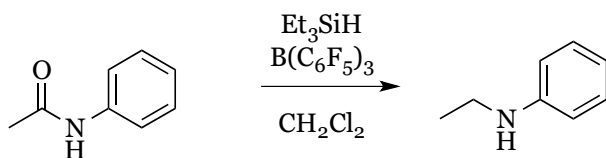

Acetanilide (0.055 g, 0.409 mmol) was dissolved in dichloromethane (4.1 mL) in a scintillation vial. Triethylsilane (0.20 mL, 1.227 mmol) was then added followed by tris(pentafluorophenyl)borane (0.021 g, 0.0409 mmol). The reaction was allowed to stir for 8 hours before being concentrated under reduced pressure and purified by flash chromatography to yield N-Ethylaniline (0.046 g, 94%).

$^1\text{H NMR}$  (400 MHz,  $\text{CDCl}_3$ )  $\delta$  7.18 (t,  $J = 7.5$  Hz, 2H), 6.70 (t,  $J = 7.5$  Hz, 1H), 6.61 (d,  $J = 7.5$  Hz, 2H), 3.61 (bs, 1H), 3.55 (bs, 1H), 3.16 (q,  $J = 7.2$  Hz, 2H), 1.26 (t,  $J = 7.2$  Hz, 3H).  $^{13}\text{C NMR}$  (101 MHz,  $\text{CDCl}_3$ )  $\delta$  129.2, 117.2, 112.7, 38.5, 14.9. **HRMS** (ESI)  $m/z$  122.0963 [calc'd for  $\text{C}_8\text{H}_{11}\text{N}$  ( $\text{M}+\text{H}^+$ ) 122.0964].

**N-Methyl-N-ethylaniline**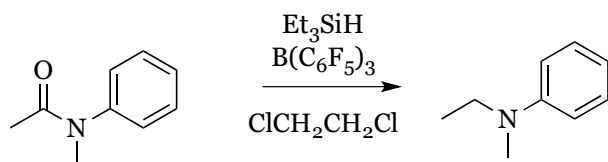

N-Methylacetanilide (0.061 g, 0.409 mmol) was dissolved in dichloroethane (4.1 mL) in a scintillation vial. Triethylsilane (0.33 mL, 2.045 mmol) was then added followed by tris(pentafluorophenyl)borane (0.021 g, 0.0409 mmol). The reaction was allowed to stir at 60°C for 8 hours before being concentrated under reduced pressure and purified by flash chromatography to yield N-Methyl-N-ethylaniline (0.041 g, 74%).

**<sup>1</sup>H NMR (400 MHz, CDCl<sub>3</sub>)** δ 7.23 (dd, *J* = 9.1, 7.6 Hz, 2H), 6.79 – 6.59 (m, 3H), 3.40 (q, *J* = 7.1 Hz, 2H), 2.90 (s, 3H), 1.12 (t, *J* = 7.1 Hz, 2H). **<sup>13</sup>C NMR (101 MHz, CDCl<sub>3</sub>)** δ 149.1, 129.2, 116.0, 112.4, 46.8, 37.5, 11.2. **HRMS (ESI)** *m/z* 136.1120 [calc'd for C<sub>9</sub>H<sub>13</sub>N (M+H<sup>+</sup>) 136.1121].

**4-Ethylaminoacetophenone**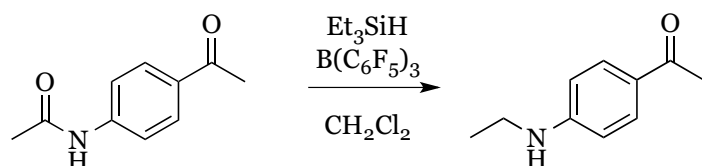

4-(Acetamido)acetophenone (0.072 g, 0.409 mmol) was dissolved in dichloromethane (4.1 mL) in a scintillation vial. Triethylsilane (0.20 mL, 1.227 mmol) was then added followed by tris(pentafluorophenyl)borane (0.021 g, 0.0409 mmol). The reaction was allowed to stir for 8 hours before being concentrated under reduced pressure and purified by flash chromatography to yield 4-(Ethylamino)acetophenone (0.058 g, 88%).

**<sup>1</sup>H NMR (400 MHz, CDCl<sub>3</sub>)** δ 7.39 (d, *J* = 8.4 Hz, 2H), 7.14 (d, *J* = 8.3 Hz, 2H), 2.61 (q, *J* = 7.6 Hz, 2H), 2.16 (s, 3H), 1.21 (t, *J* = 7.6 Hz, 3H). **<sup>13</sup>C NMR (101 MHz, CDCl<sub>3</sub>)** δ 168.1, 140.4, 135.5, 128.3, 120.1, 28.3, 24.5, 15.6. **HRMS (ESI)** *m/z* 164.1070 [calc'd for C<sub>10</sub>H<sub>13</sub>NO (M+H<sup>+</sup>) 164.1070].

**Ethyl-4-ethylaminobenzoate**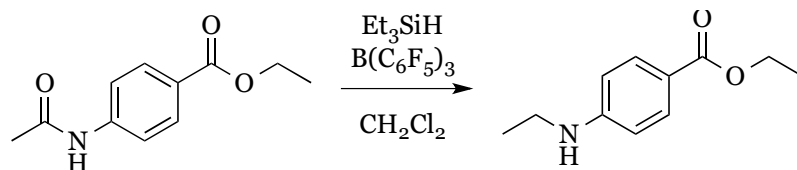

Ethyl-4-(acetamido)benzoate (0.085 g, 0.409 mmol) was dissolved in dichloromethane (4.1 mL) in a scintillation vial. Triethylsilane (0.20 mL, 1.227 mmol) was then added followed by tris(pentafluorophenyl)borane (0.021 g,

0.0409 mmol). The reaction was allowed to stir for 8 hours before being concentrated under reduced pressure and purified by flash chromatography to yield Ethyl-4-(ethylamino)benzoate (0.069 g, 87%).

**<sup>1</sup>H NMR (400 MHz, CDCl<sub>3</sub>)** δ 7.87 (d, *J* = 8.8 Hz, 2H), 6.54 (d, *J* = 8.8 Hz, 2H), 4.31 (q, *J* = 7.1 Hz, 2H), 3.22 (q, *J* = 7.2 Hz, 2H), 1.36 (t, *J* = 7.1 Hz, 3H), 1.28 (t, *J* = 7.2 Hz, 3H). **<sup>13</sup>C NMR (101 MHz, CDCl<sub>3</sub>)** δ 166.9, 151.9, 131.4, 118.5, 111.3, 60.2, 37.9, 14.6, 14.5. **HRMS (ESI)** *m/z* 194.1176 [calc'd for C<sub>11</sub>H<sub>15</sub>NO<sub>2</sub> (M+H<sup>+</sup>) 194.1176].

### Inhibitory Study:

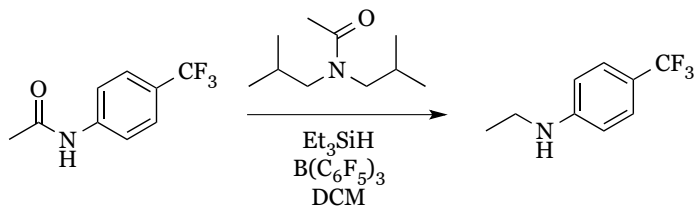

4-Trifluoromethylacetanilide (0.083 g, 0.409 mmol) and N-acetyl-diisobutylamine (0.070 g, 0.409 mmol) were dissolved in dichloromethane (4.1 mL) in a scintillation vial. Triethylsilane (0.67 mL, 4.09 mmol) was then added followed by tris(pentafluorophenyl)borane (0.315 g, 0.614 mmol). The reaction was allowed to stir for 8 hours before being concentrated under reduced pressure and purified by flash chromatography to yield 4-Trifluoromethyl-N-ethylaniline (0.037 g, 48%). Without the molar excess of borane, no product formation was observed.

Characterization Data: See Above

### 2-(4'-Methoxycarbonyl)-N,N-bis(triethylsilyl)phenethylamine

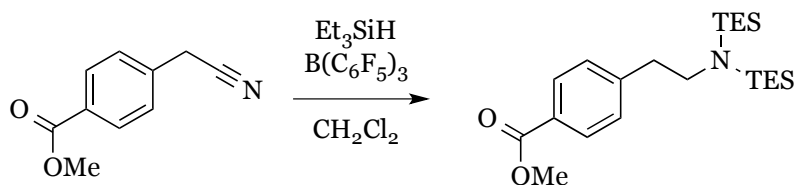

Methyl 4-(cyanomethyl) benzoate (0.071 g, 0.409 mmol) was dissolved in dichloromethane (4.1 mL) in a scintillation vial. Triethylsilane (0.19 mL, 1.227 mmol) was then added followed by tris(pentafluorophenyl)borane (0.021 g, 0.0409 mmol). The reaction was allowed to stir for 8 hours before being concentrated under reduced pressure and purified by flash chromatography to yield 2-(4'-Methoxy)-N,N-bis(triethylsilyl)phenethylamine (0.139 g, 84%).

**<sup>1</sup>H NMR (400 MHz, CDCl<sub>3</sub>)** δ 7.96 (d, *J* = 8.2 Hz, 2H), 7.21 (d, *J* = 8.2 Hz, 2H), 3.90 (s, 3H), 3.05 – 2.85 (m, 2H), 2.78 – 2.64 (m, 2H), 0.98 (t, *J* = 7.9 Hz, 18H), 0.68 (q, *J* = 7.9 Hz, 12H). **<sup>13</sup>C NMR (101 MHz, CDCl<sub>3</sub>)** δ 167.1, 145.7, 129.8, 128.5, 128.0, 52.0, 47.6, 42.5, 7.6, 5.7. **HRMS (ESI)** *m/z* 408.2745 [calc'd for C<sub>22</sub>H<sub>41</sub>NO<sub>2</sub>Si<sub>2</sub> (M+H<sup>+</sup>) 408.2749]

**2-(4'-Methoxy)-N,N-bis(triethylsilyl)phenethylamine**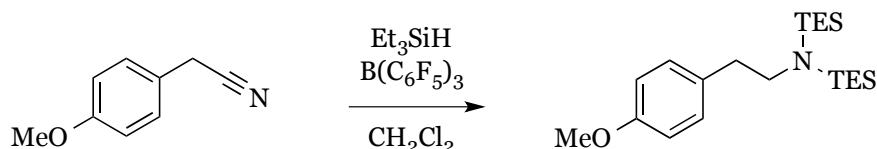

4-Methoxyphenylacetonitrile (0.060 g, 0.409 mmol) was dissolved in dichloromethane (4.1 mL) in a scintillation vial. Triethylsilane (0.19 mL, 1.227 mmol) was then added followed by tris(pentafluorophenyl)borane (0.021 g, 0.0409 mmol). The reaction was allowed to stir for 8 hours before being concentrated under reduced pressure and purified by flash chromatography to yield 2-(4'-Methoxy)-N,N-bis(triethylsilyl)phenethylamine (0.128 g, 83%).

<sup>1</sup>H NMR (400 MHz, CDCl<sub>3</sub>) δ 7.08 (d, *J* = 8.6 Hz, 2H), 6.83 (d, *J* = 8.6 Hz, 2H), 3.79 (s, 3H), 2.97 – 2.82 (m, 2H), 2.65 – 2.54 (m, 2H), 0.97 (t, *J* = 7.9 Hz, 18H), 0.67 (q, *J* = 7.9 Hz, 12H). <sup>13</sup>C NMR (101 MHz, CDCl<sub>3</sub>) δ 157.9, 132.4, 129.4, 113.8, 55.2, 48.2, 41.4, 7.6, 5.7. HRMS (ESI) *m/z* 380.2793 [calc'd for C<sub>21</sub>H<sub>41</sub>NOSi<sub>2</sub> (M+H<sup>+</sup>) 380.2799]

**4-Ethylaminophenylacetonitrile**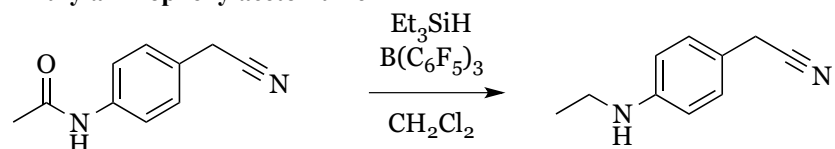

4-Acetamidylphenylacetonitrile (0.071 g, 0.409 mmol) was dissolved in dichloromethane (4.1 mL) in a scintillation vial. Triethylsilane (0.19 mL, 1.227 mmol) was then added followed by tris(pentafluorophenyl)borane (0.021 g, 0.0409 mmol). The reaction was allowed to stir for 8 hours before being concentrated under reduced pressure and purified by flash chromatography to yield 4-Ethylaminophenylacetonitrile (0.060 g, 92%).

<sup>1</sup>H NMR (400 MHz, CDCl<sub>3</sub>) δ 7.10 (d, *J* = 8.6 Hz, 2H), 6.58 (d, *J* = 8.6 Hz, 2H), 3.63 (s, 3H), 3.15 (q, *J* = 7.1 Hz, 2H), 1.26 (t, *J* = 7.1 Hz, 3H). <sup>13</sup>C NMR (101 MHz, CDCl<sub>3</sub>) δ 148.13, 128.89, 118.69, 117.76, 113.02, 38.43, 22.81, 14.79. HRMS (ESI) *m/z* 161.1072 [calc'd for C<sub>10</sub>H<sub>12</sub>N<sub>2</sub> (M+H<sup>+</sup>) 161.1073].

**Acetoacetanilide Triethylsilylether (Mixture of E/Z Amide Conformations)**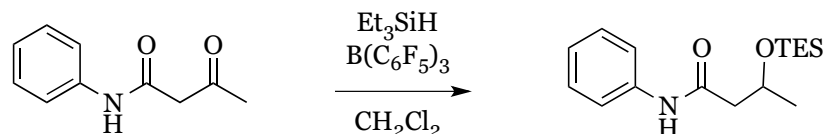

Acetoacetanilide (0.072 g, 0.409 mmol) was dissolved in dichloromethane (4.1 mL) in a scintillation vial. Triethylsilane (0.20 mL, 1.227 mmol) was then added followed by tris(pentafluorophenyl)borane (0.021 g, 0.0409 mmol). The reaction was allowed to stir for 8 hours before being concentrated under reduced pressure and purified by flash chromatography to yield acetoacetanilide triethylsilylether (0.118 g, 89%).

<sup>1</sup>H NMR (400 MHz, CDCl<sub>3</sub>) δ 8.71 (s, 0.4H), 8.38 (s, 0.6H), 7.53 – 7.45 (m, 2H), 7.35 – 7.24 (m, 2H), 7.16 – 7.03 (m, 1H), 4.34 – 4.16 (m, 1H), 2.69 – 2.31 (m, 2H), 1.29 (d, *J* = 6.3 Hz, 1.2H), 1.24 (d, *J* = 6.3 Hz, 1.8H), 0.98 (t, *J* =

7.9 Hz, 3.6H), 0.93 (t,  $J = 7.9$  Hz, 2.4H), 0.66 (q,  $J = 7.9$  Hz, 2.4H), 0.52 (q,  $J = 7.9$  Hz, 1.6H).  $^{13}\text{C}$  NMR (101 MHz,  $\text{CDCl}_3$ )  $\delta$  170.9, 170.0, 137.9, 137.6, 129.0, 128.96, 124.5, 124.2, 120.2, 119.8, 66.0, 65.0, 46.6, 44.9, 23.0, 23.0, 6.8, 6.4, 4.8, 4.8. HRMS (ESI)  $m/z$  294.1880 [calc'd for  $\text{C}_{16}\text{H}_{27}\text{NO}_2\text{Si}$  ( $\text{M}+\text{H}^+$ ) 294.1884]

#### Acetoacetanilide Triethylsilylether (Mixture of E/Z Amide Conformations)

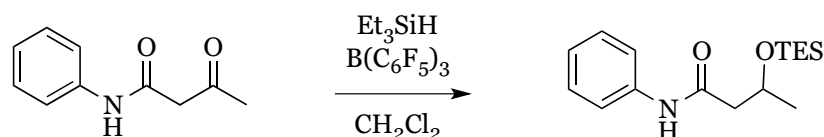

Acetoacetanilide (0.072 g, 0.409 mmol) was dissolved in dichloromethane (4.1 mL) in a scintillation vial. Triethylsilane (0.20 mL, 1.227 mmol) was then added followed by tris(pentafluorophenyl)borane (0.021 g, 0.0409 mmol). The reaction was allowed to stir for 8 hours before being concentrated under reduced pressure and purified by flash chromatography to yield acetoacetanilide triethylsilylether (0.118 g, 89%).

$^1\text{H}$  NMR (400 MHz,  $\text{CDCl}_3$ )  $\delta$  8.71 (s, 0.4H), 8.38 (s, 0.6H), 7.53 – 7.45 (m, 2H), 7.35 – 7.24 (m, 2H), 7.16 – 7.03 (m, 1H), 4.34 – 4.16 (m, 1H), 2.69 – 2.31 (m, 2H), 1.29 (d,  $J = 6.3$  Hz, 1.2H), 1.24 (d,  $J = 6.3$  Hz, 1.8H), 0.98 (t,  $J = 7.9$  Hz, 3.6H), 0.93 (t,  $J = 7.9$  Hz, 2.4H), 0.66 (q,  $J = 7.9$  Hz, 2.4H), 0.52 (q,  $J = 7.9$  Hz, 1.6H).  $^{13}\text{C}$  NMR (101 MHz,  $\text{CDCl}_3$ )  $\delta$  170.9, 170.0, 137.9, 137.6, 129.0, 128.96, 124.5, 124.2, 120.2, 119.8, 66.0, 65.0, 46.6, 44.9, 23.0, 23.0, 6.8, 6.4, 4.8, 4.8. HRMS (ESI)  $m/z$  294.1880 [calc'd for  $\text{C}_{16}\text{H}_{27}\text{NO}_2\text{Si}$  ( $\text{M}+\text{H}^+$ ) 294.1884]

#### *p*-Chloro-Acetoacetanilide Triethylsilylether

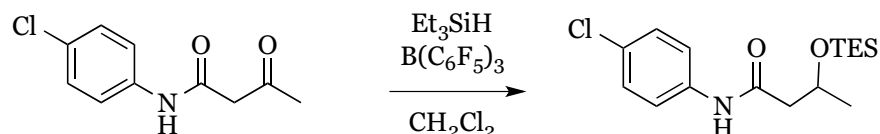

*p*-Chloroacetoacetanilide (0.086 g, 0.409 mmol) was dissolved in dichloromethane (4.1 mL) in a scintillation vial. Triethylsilane (0.20 mL, 1.227 mmol) was then added followed by tris(pentafluorophenyl)borane (0.021 g, 0.0409 mmol). The reaction was allowed to stir for 8 hours before being concentrated under reduced pressure and purified by flash chromatography to yield *p*-chloroacetoacetanilide triethylsilylether (0.120 g, 90%).

$^1\text{H}$  NMR (400 MHz,  $\text{CDCl}_3$ )  $\delta$  8.61 (bs, 1H), 7.46 (d,  $J = 8.8$  Hz, 2H), 7.27 (d,  $J = 8.8$  Hz, 2H), 4.35 – 4.23 (m, 1H), 2.65 (dd,  $J = 14.9, 3.8$  Hz, 1H), 2.40 (dd,  $J = 14.9, 5.6$  Hz, 1H), 1.30 (d,  $J = 6.3$  Hz, 3H), 0.98 (t,  $J = 7.9$  Hz, 8H), 0.66 (q,  $J = 7.9$  Hz, 6H).  $^{13}\text{C}$  NMR (101 MHz,  $\text{CDCl}_3$ )  $\delta$  169.6, 136.7, 129.0, 128.8, 120.8, 66.0, 46.7, 23.0, 6.8, 4.8. HRMS (ESI)  $m/z$  328.1490 [calc'd for  $\text{C}_{16}\text{H}_{26}\text{NO}_2\text{ClSi}$  ( $\text{M}+\text{H}^+$ ) 328.1494]

**3.  $^1\text{H}$ -NMR and  $^{13}\text{C}$ -NMR Spectra**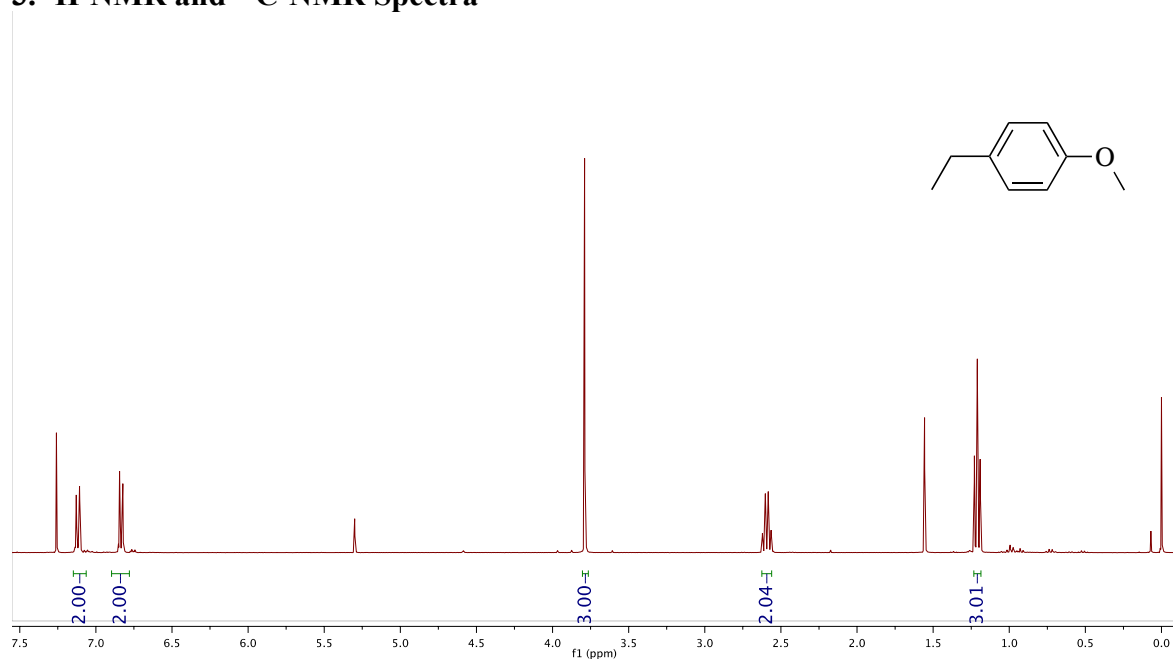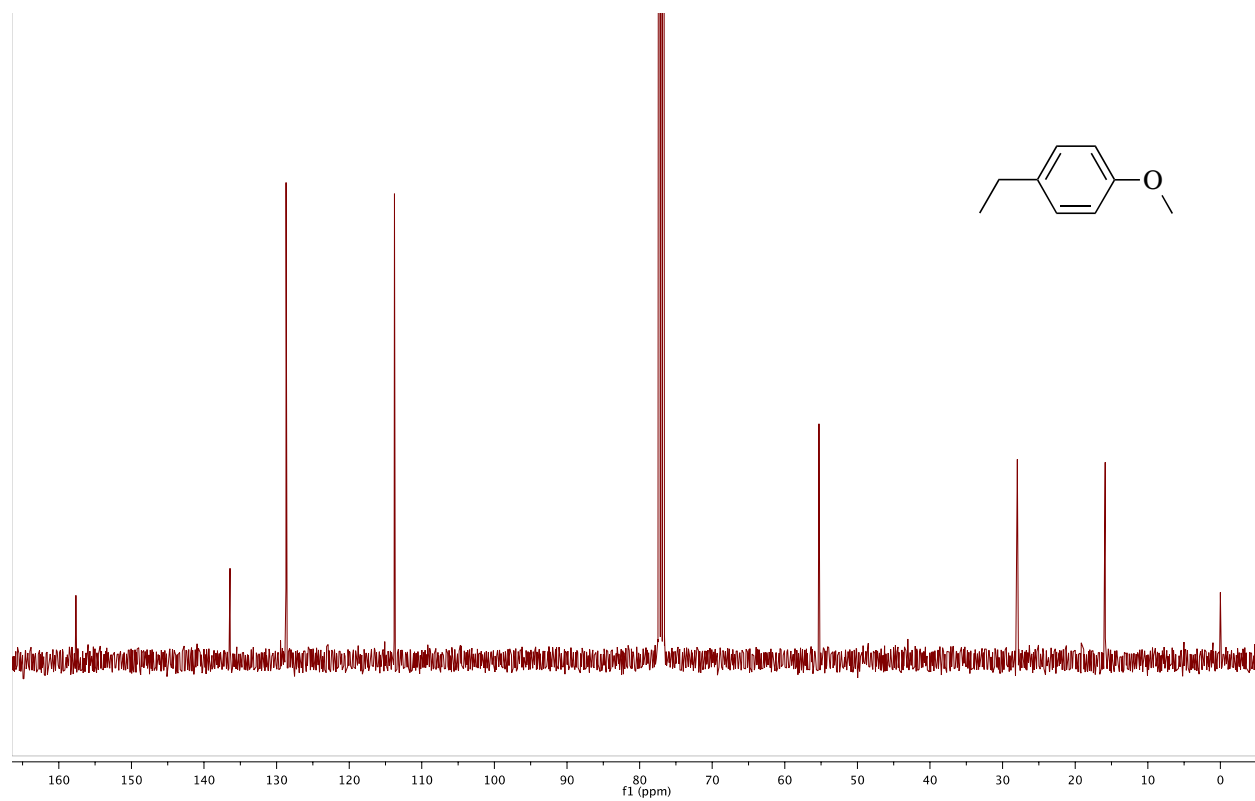



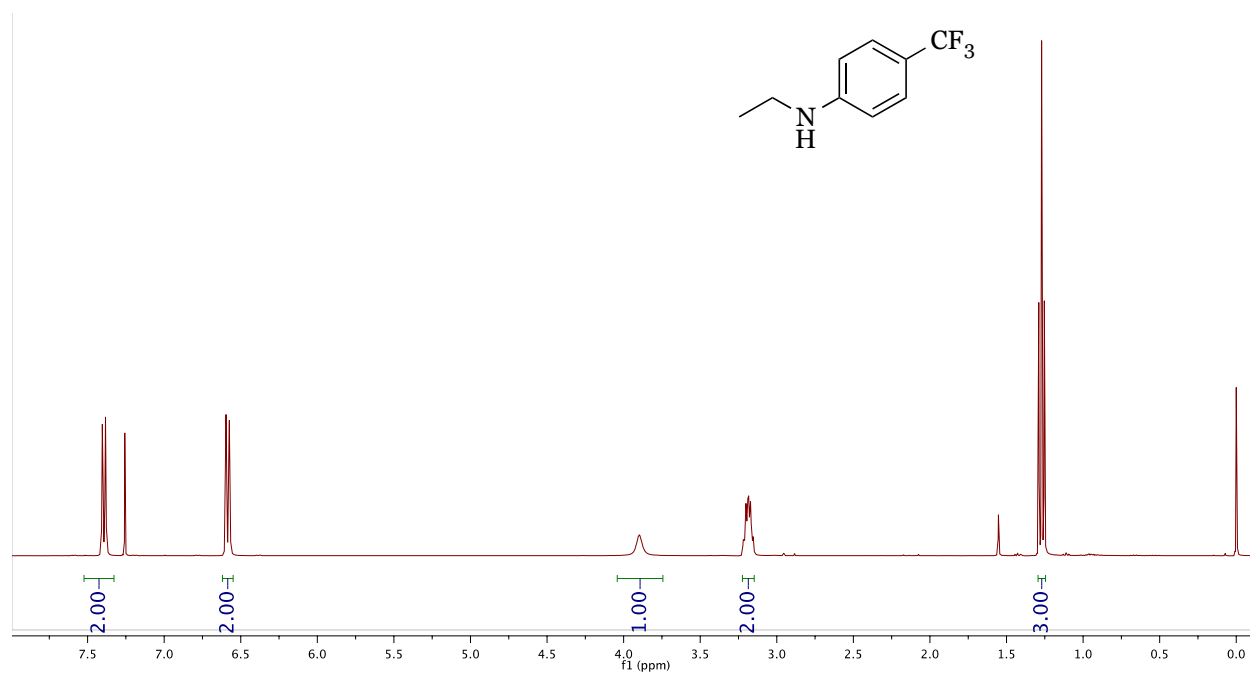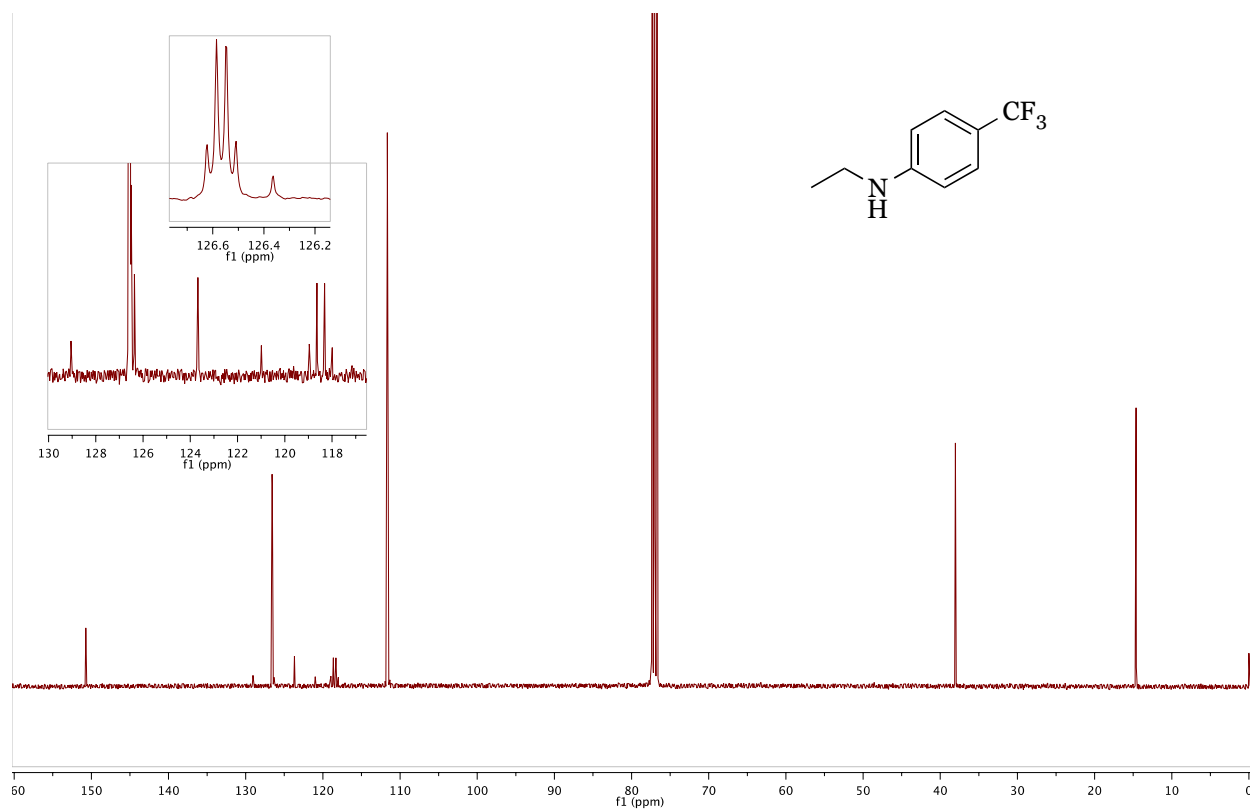

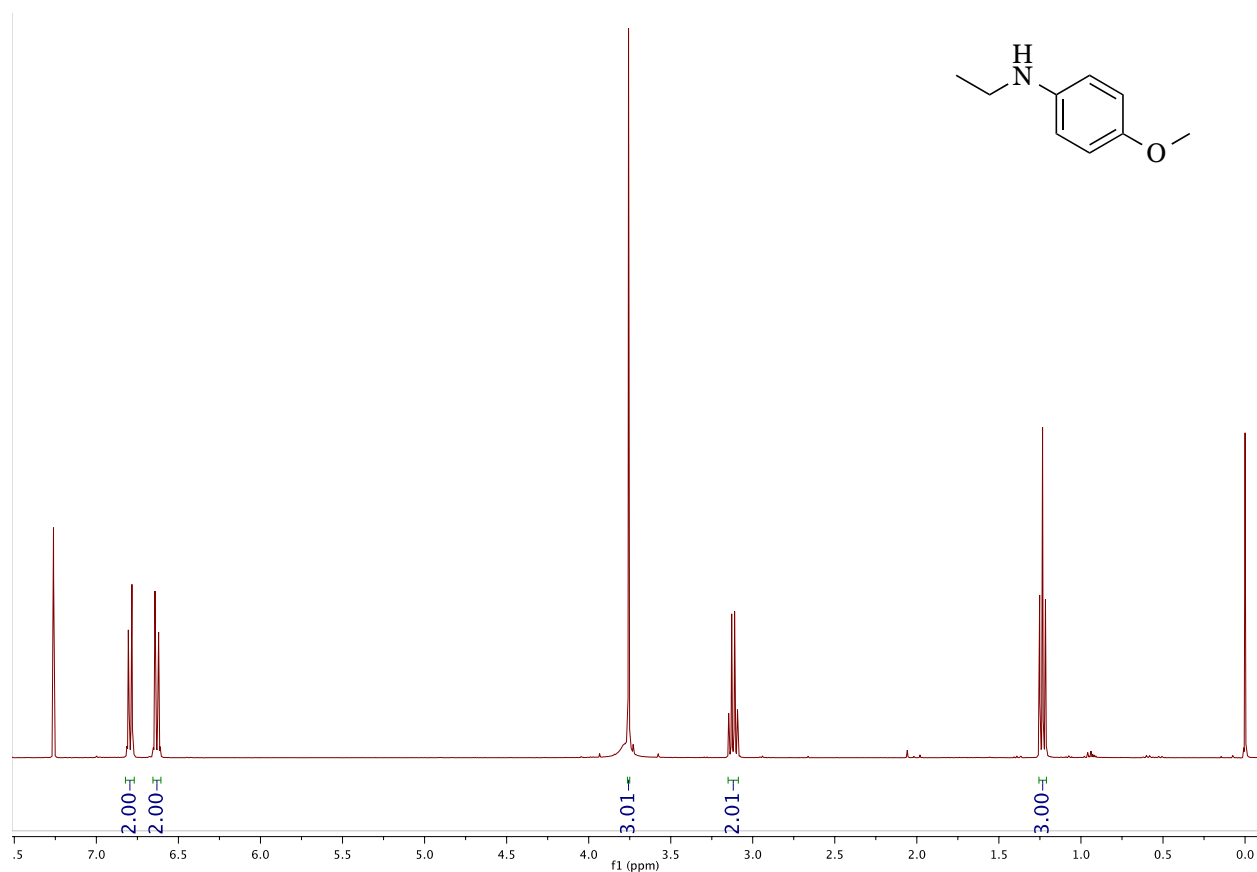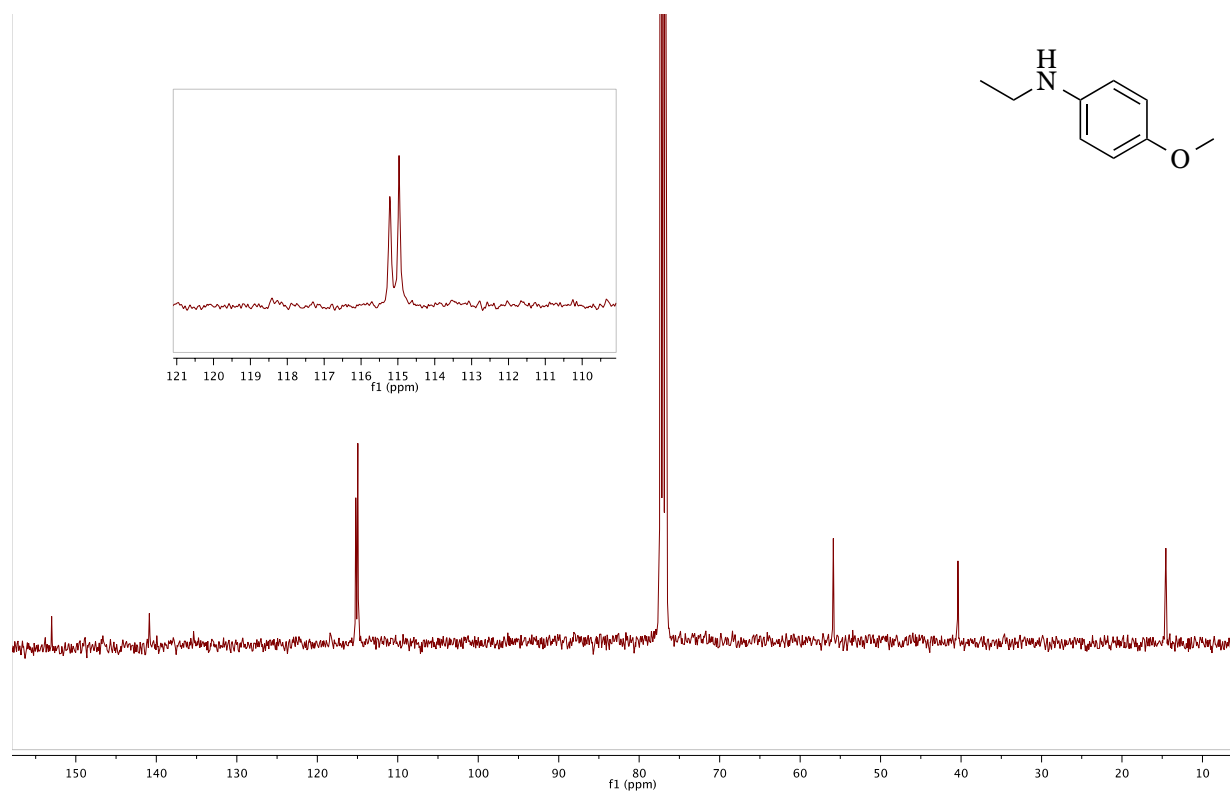

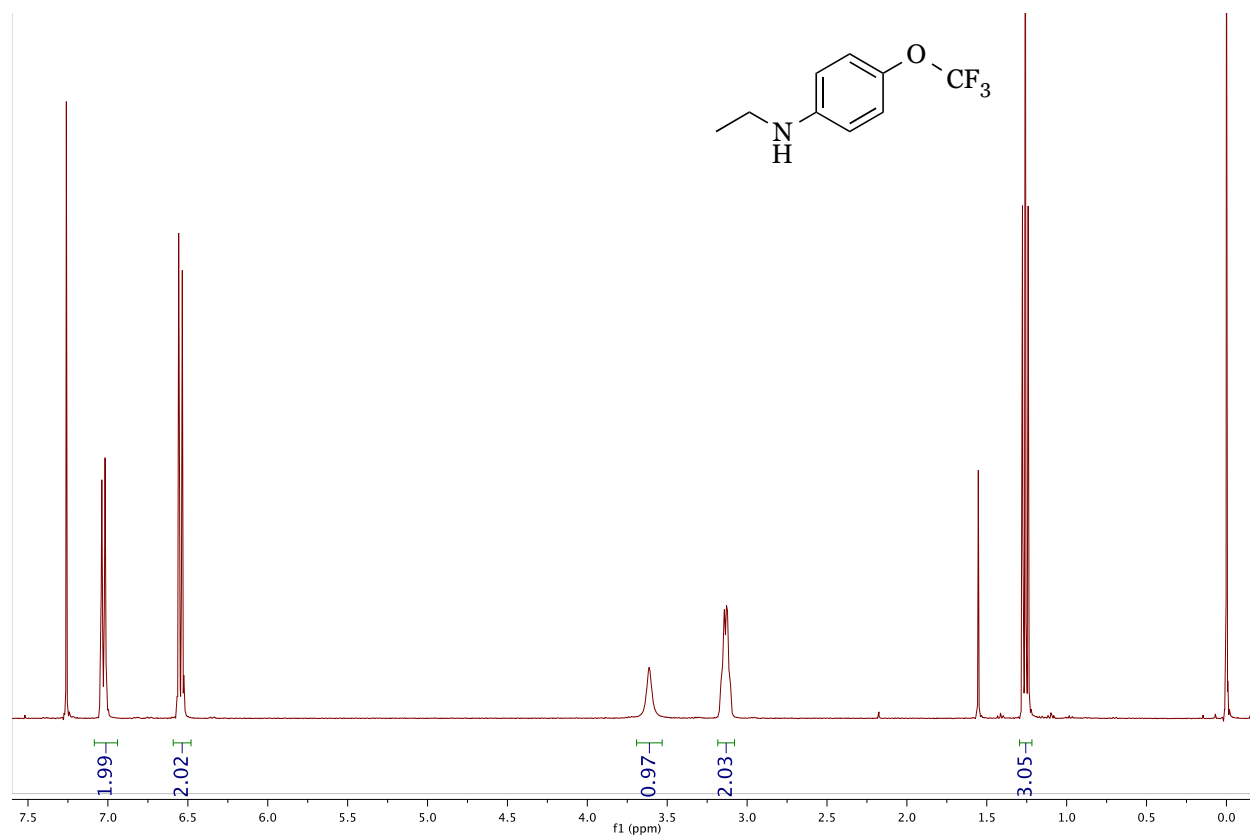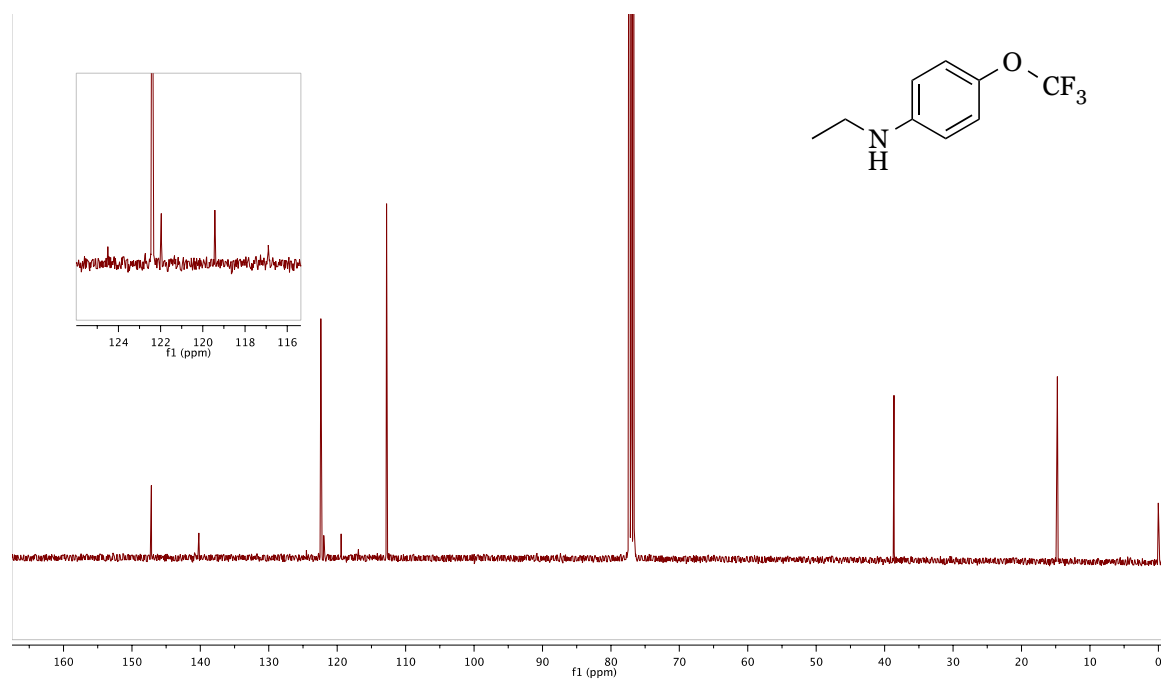

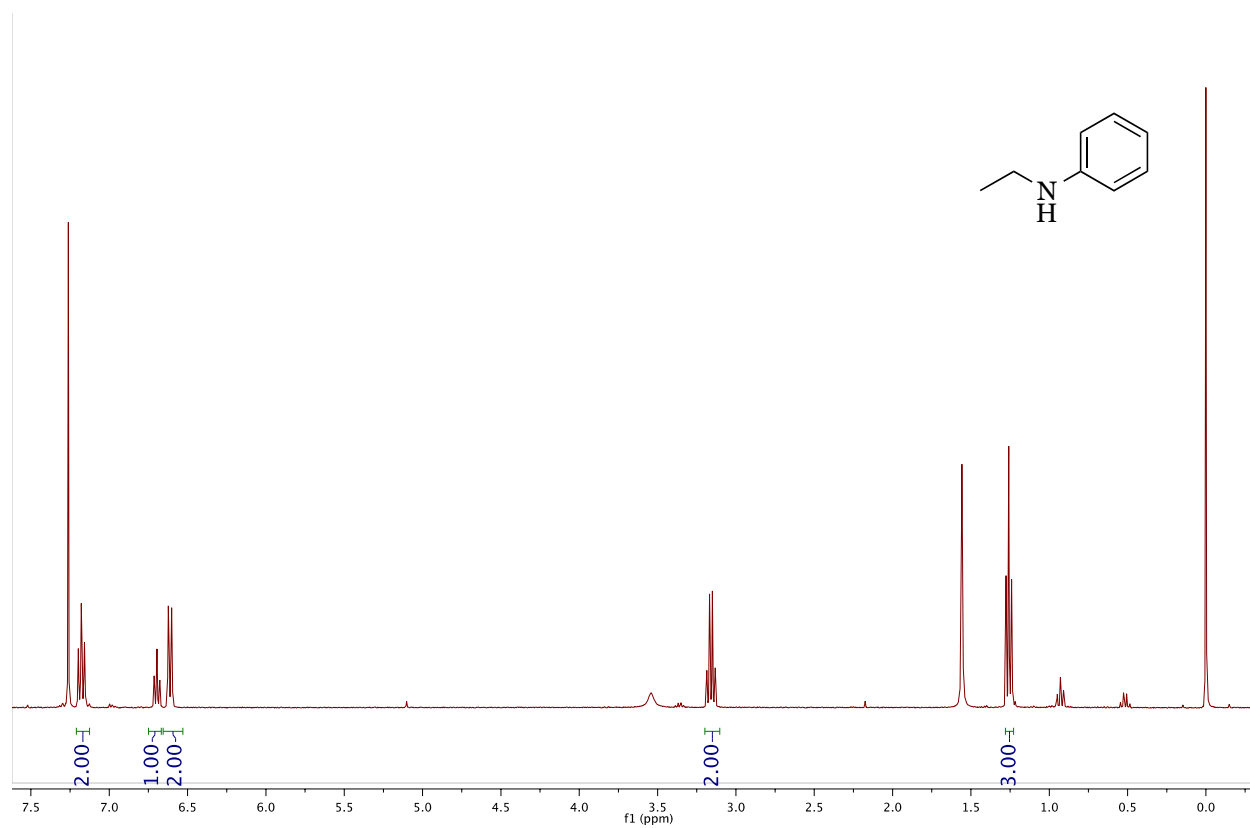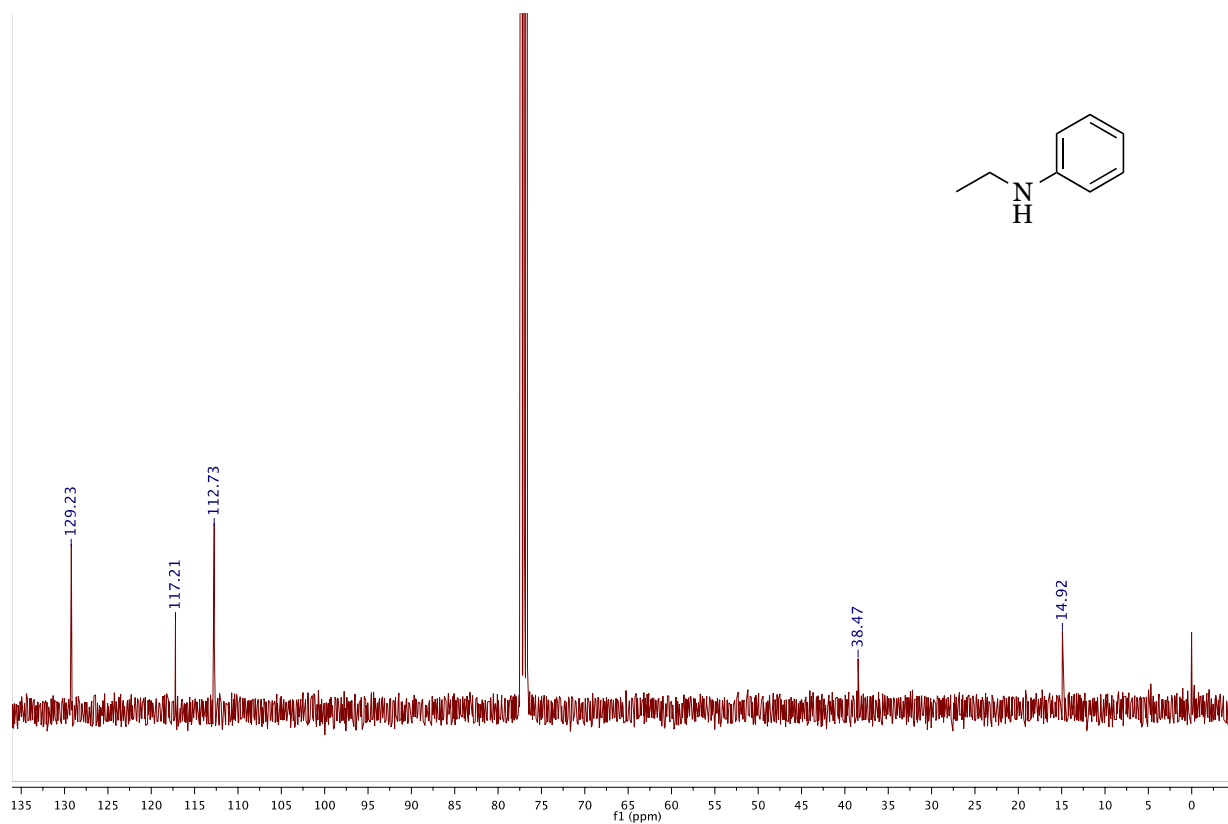

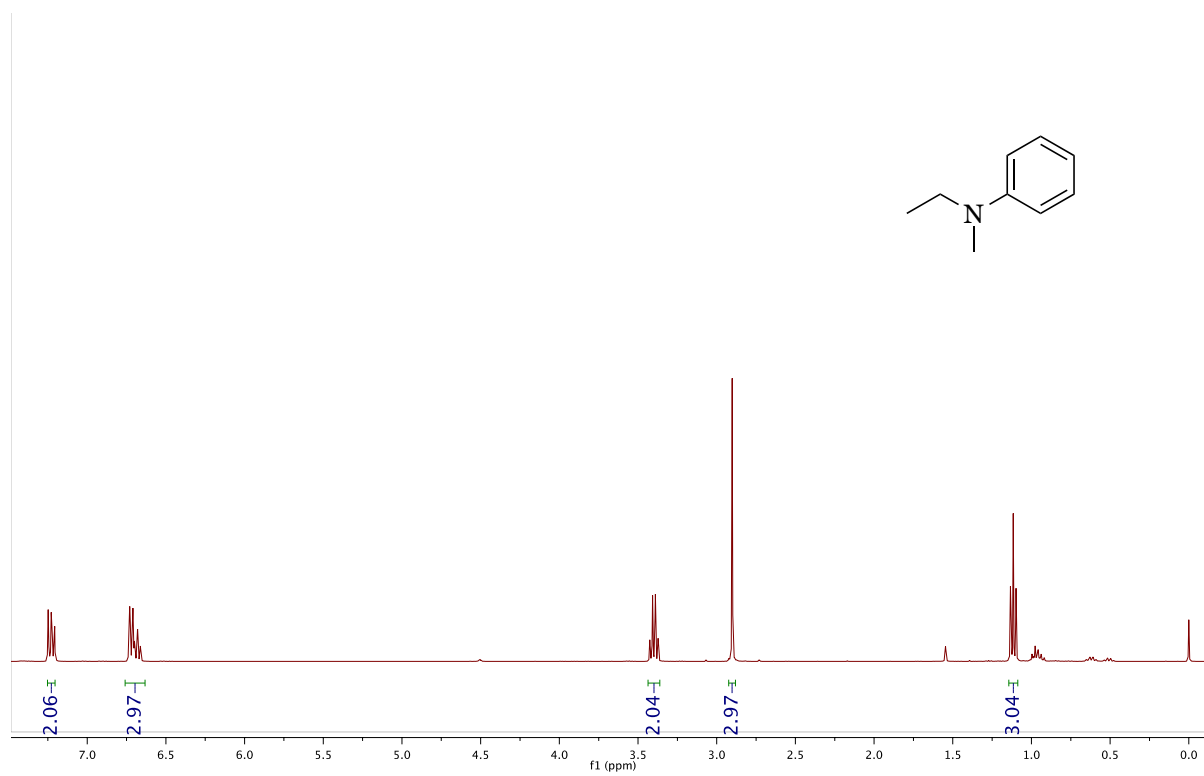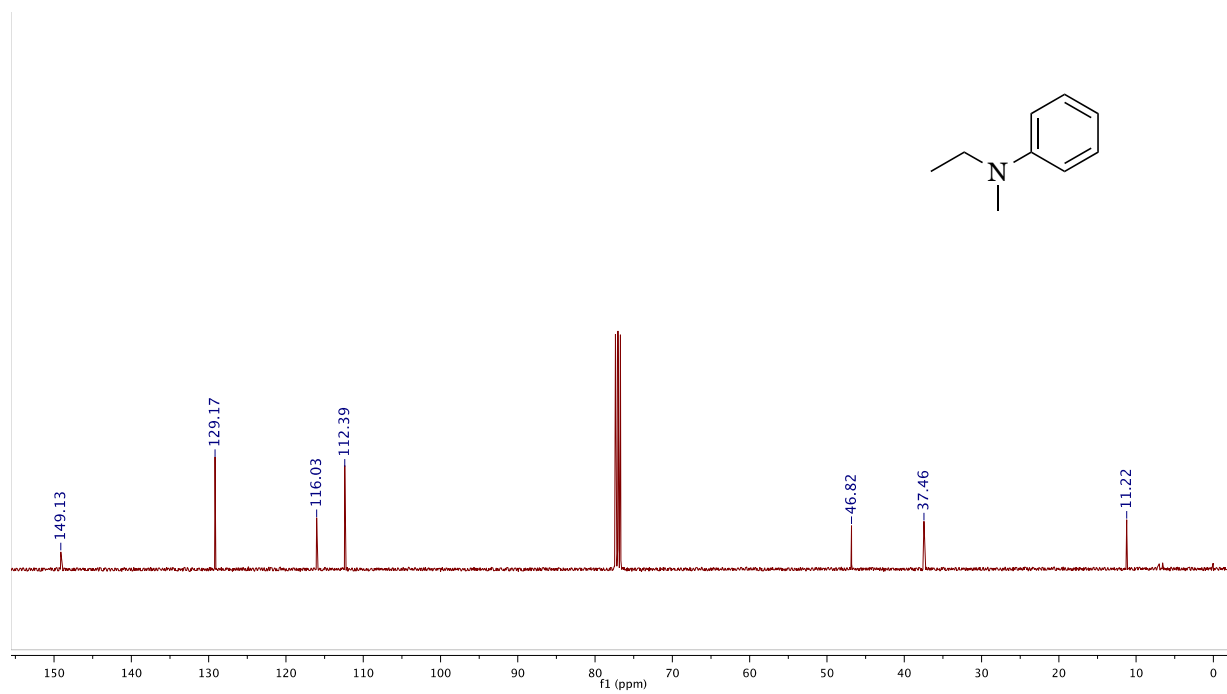

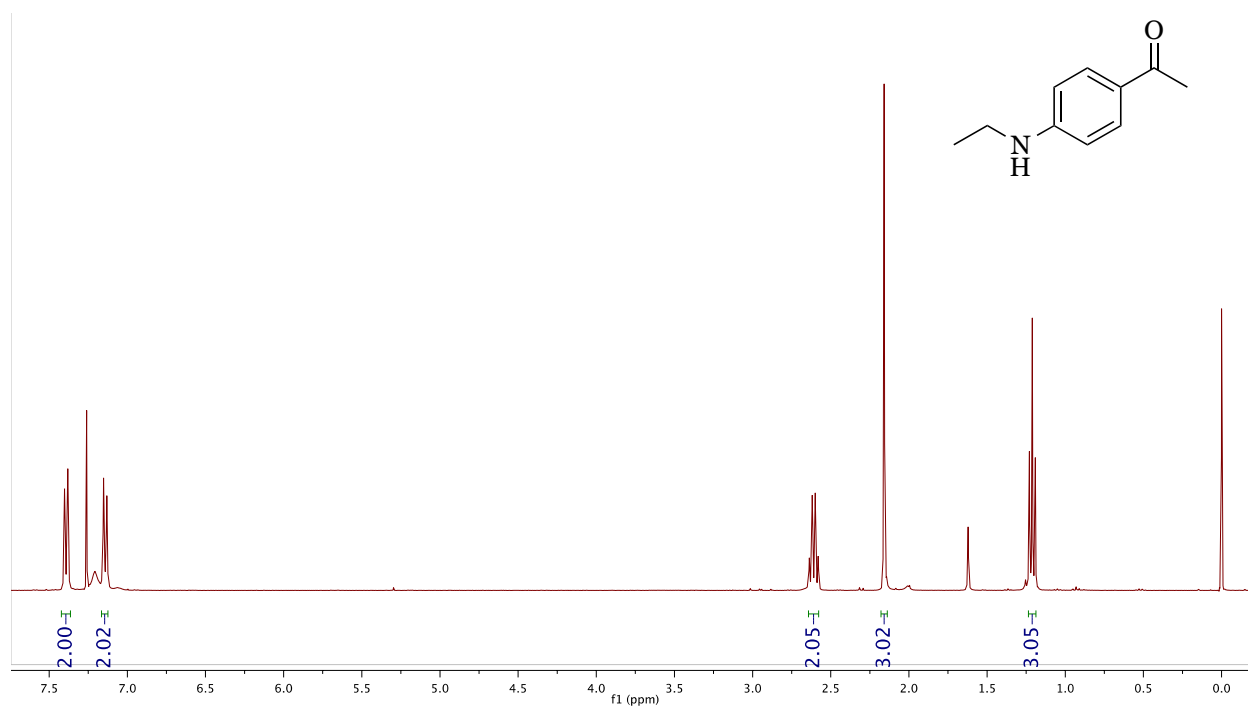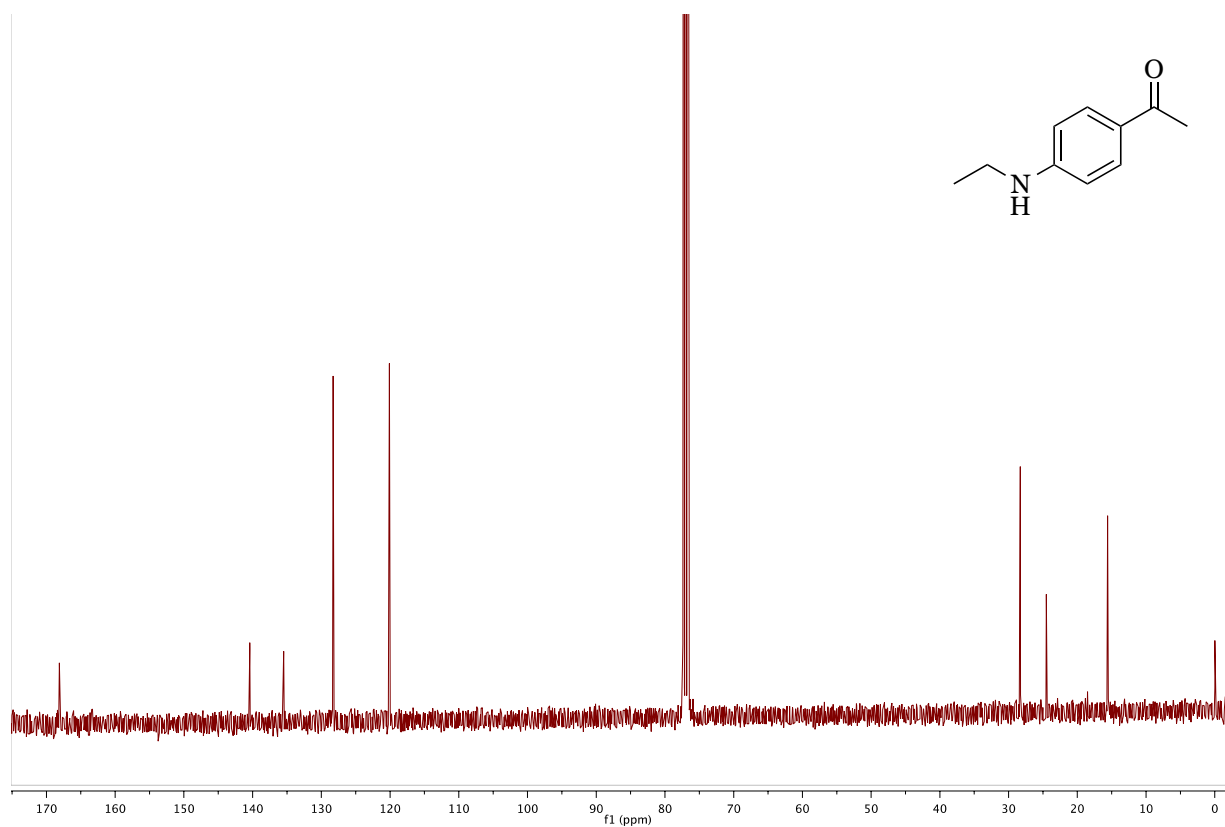

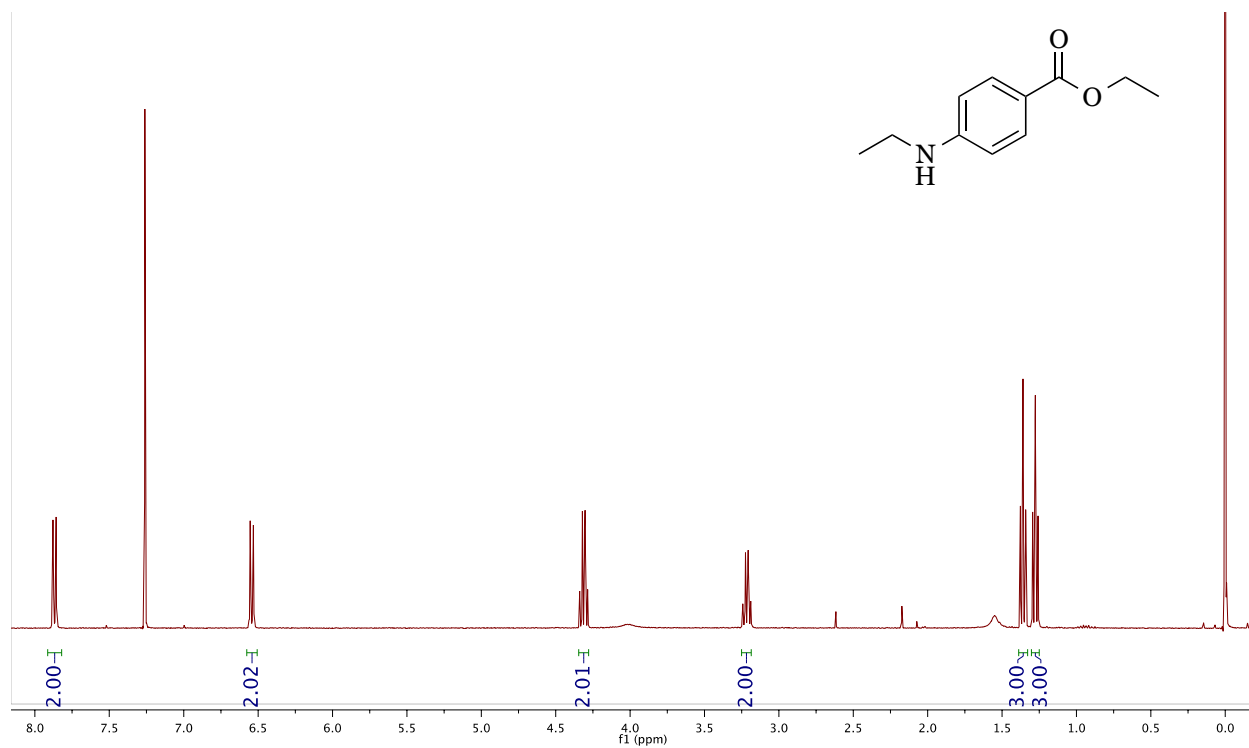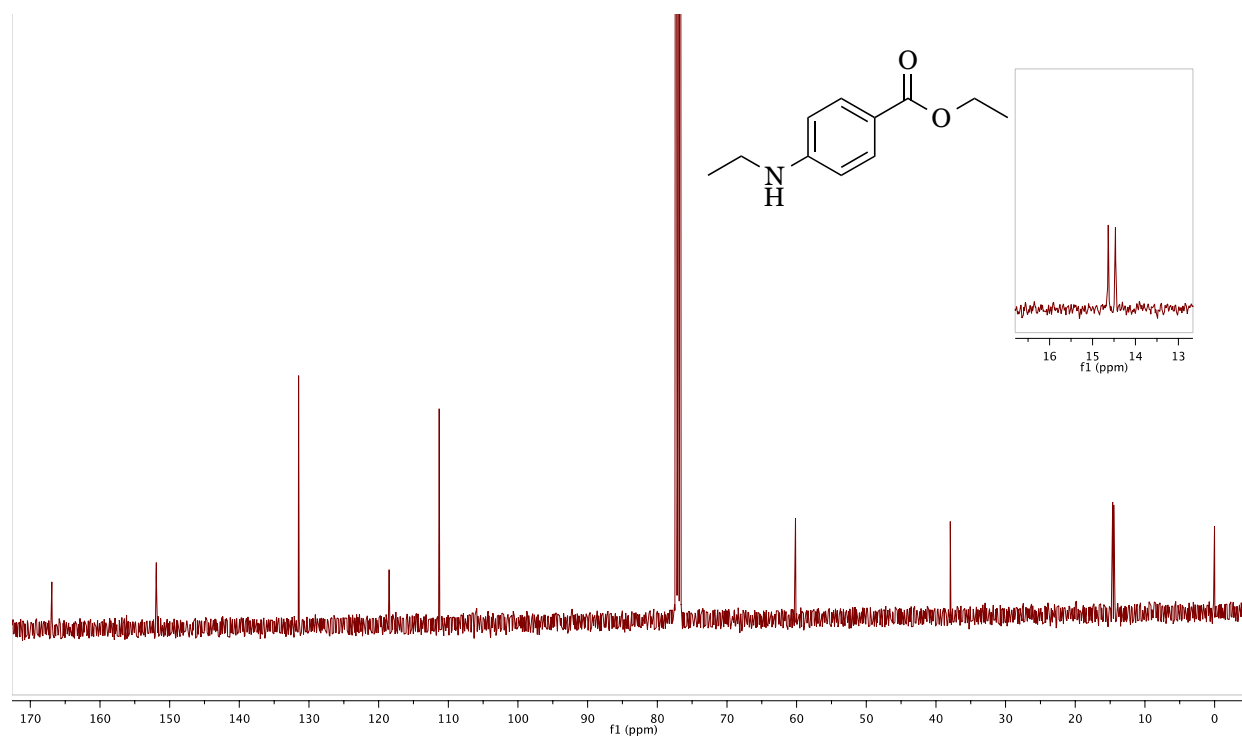

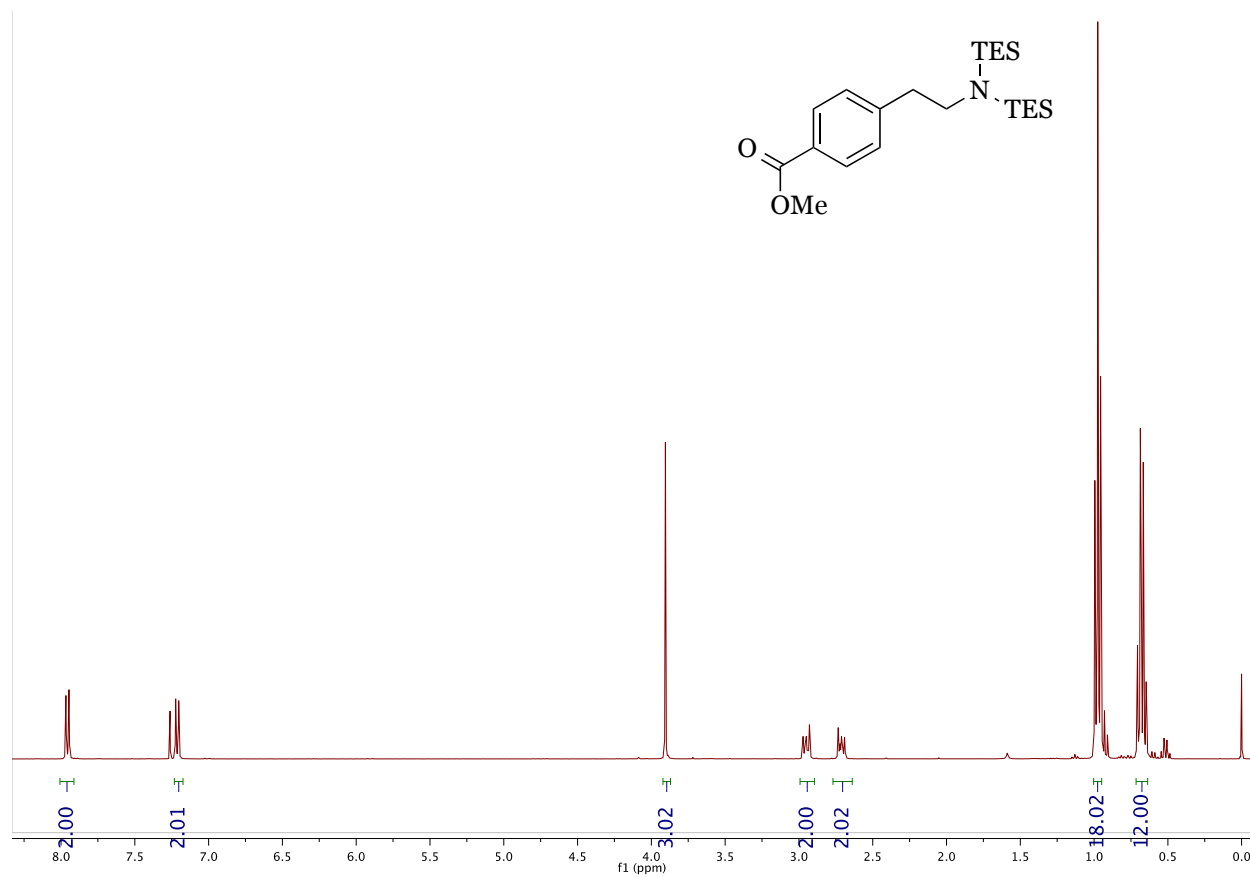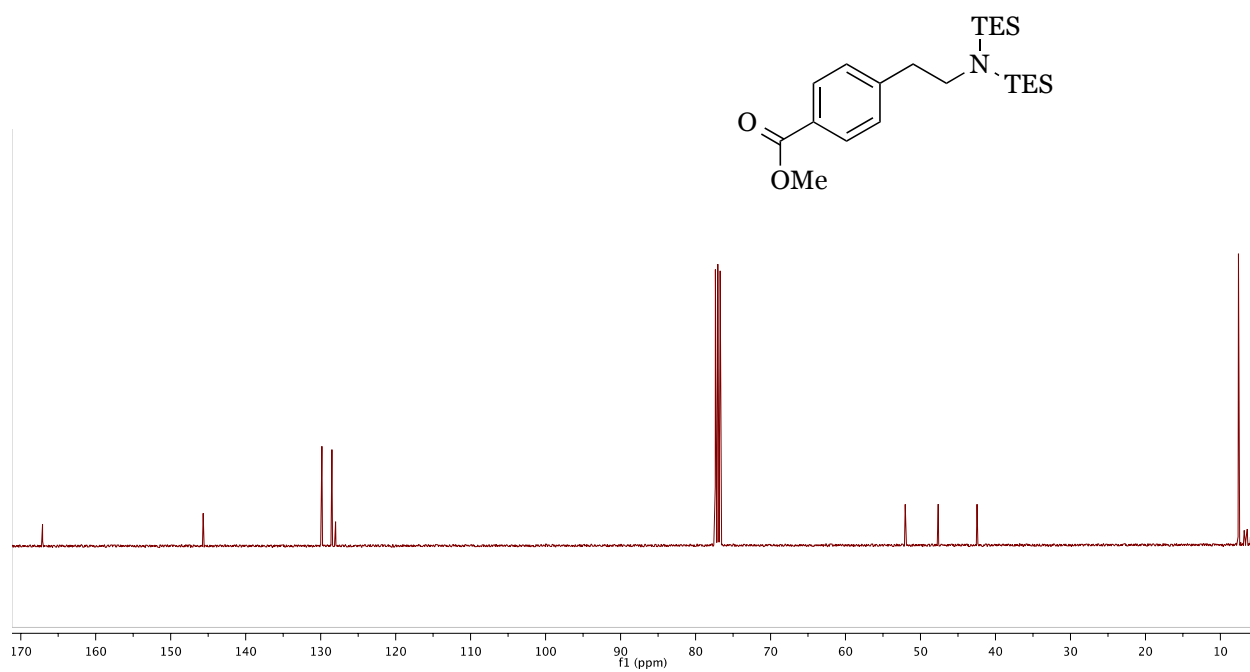



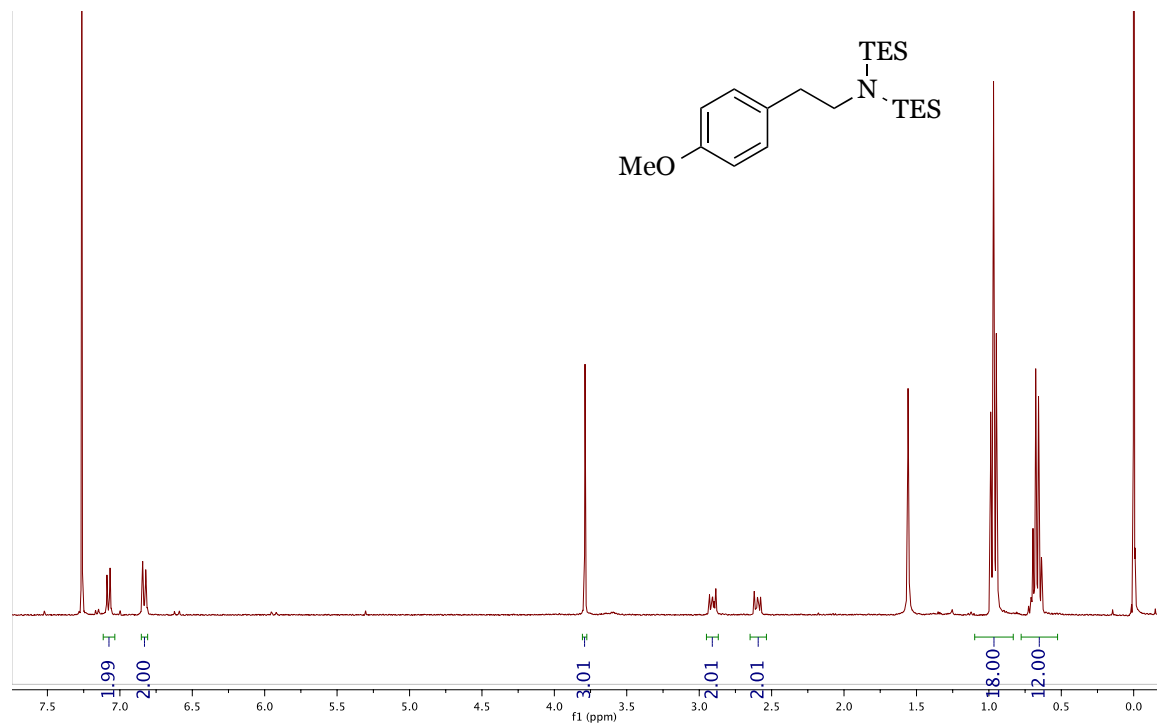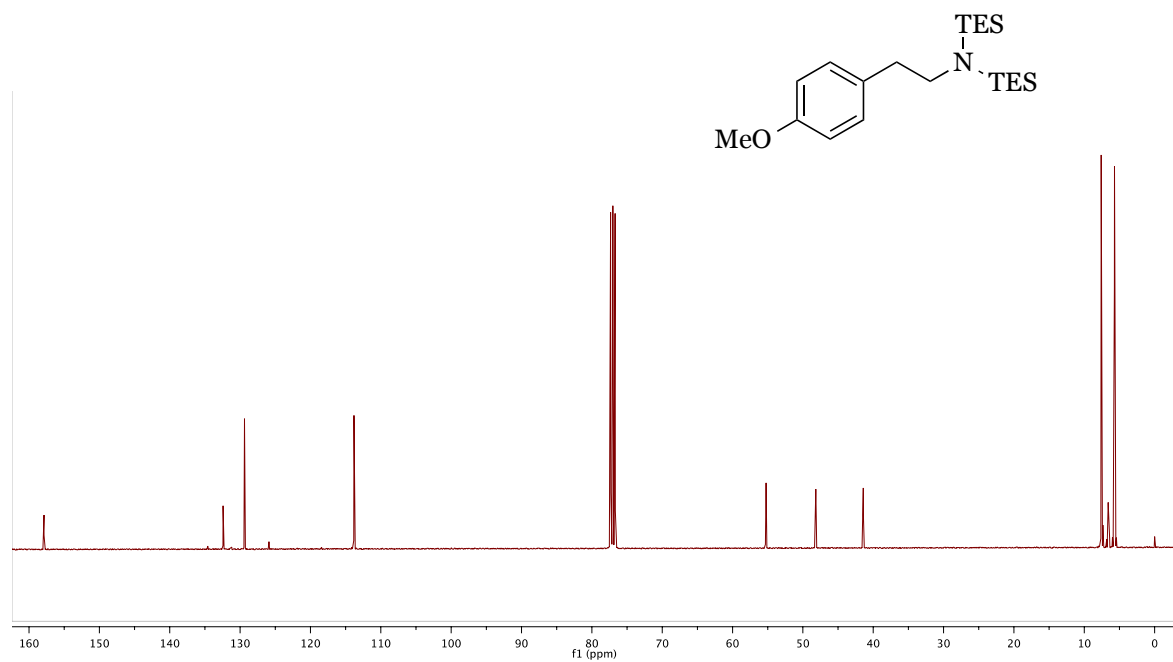

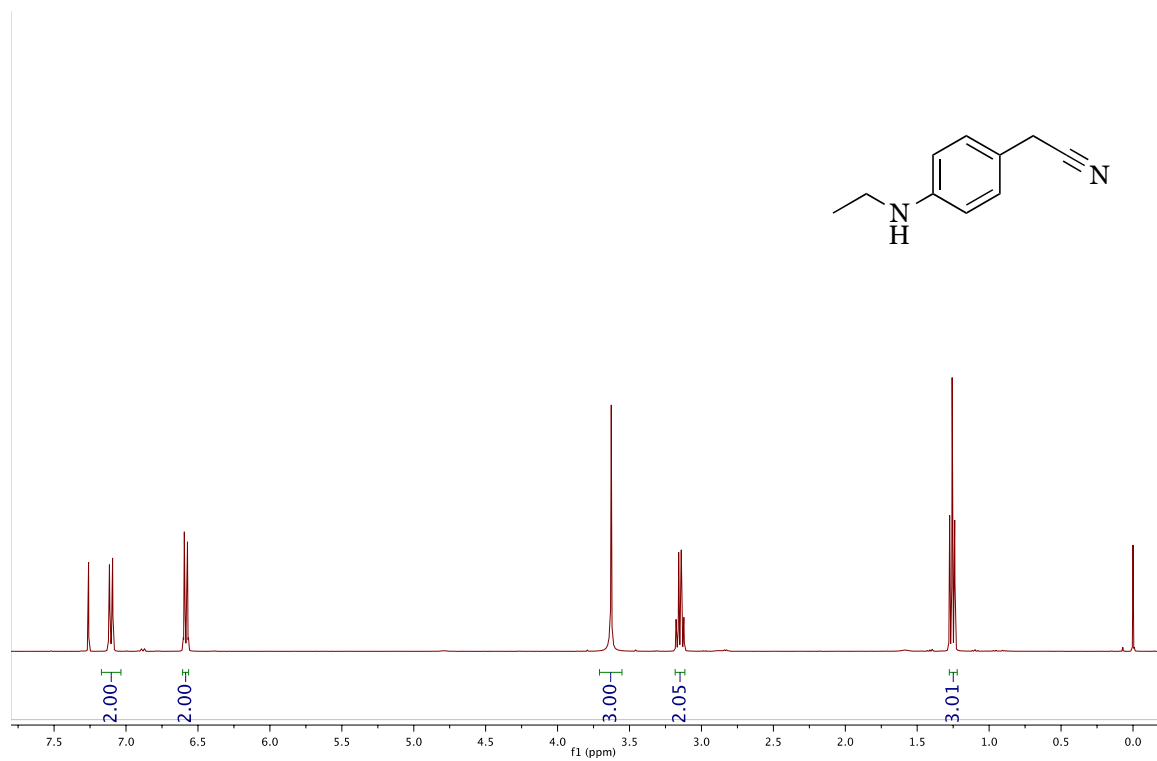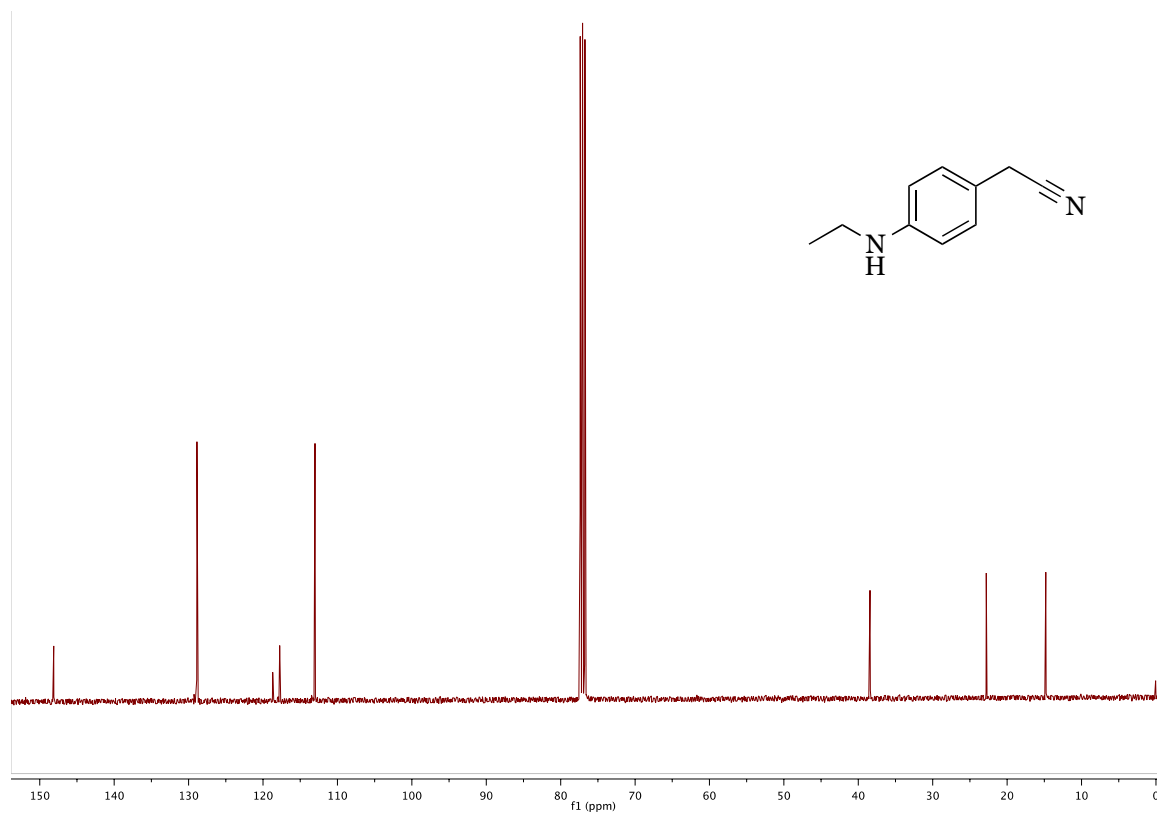

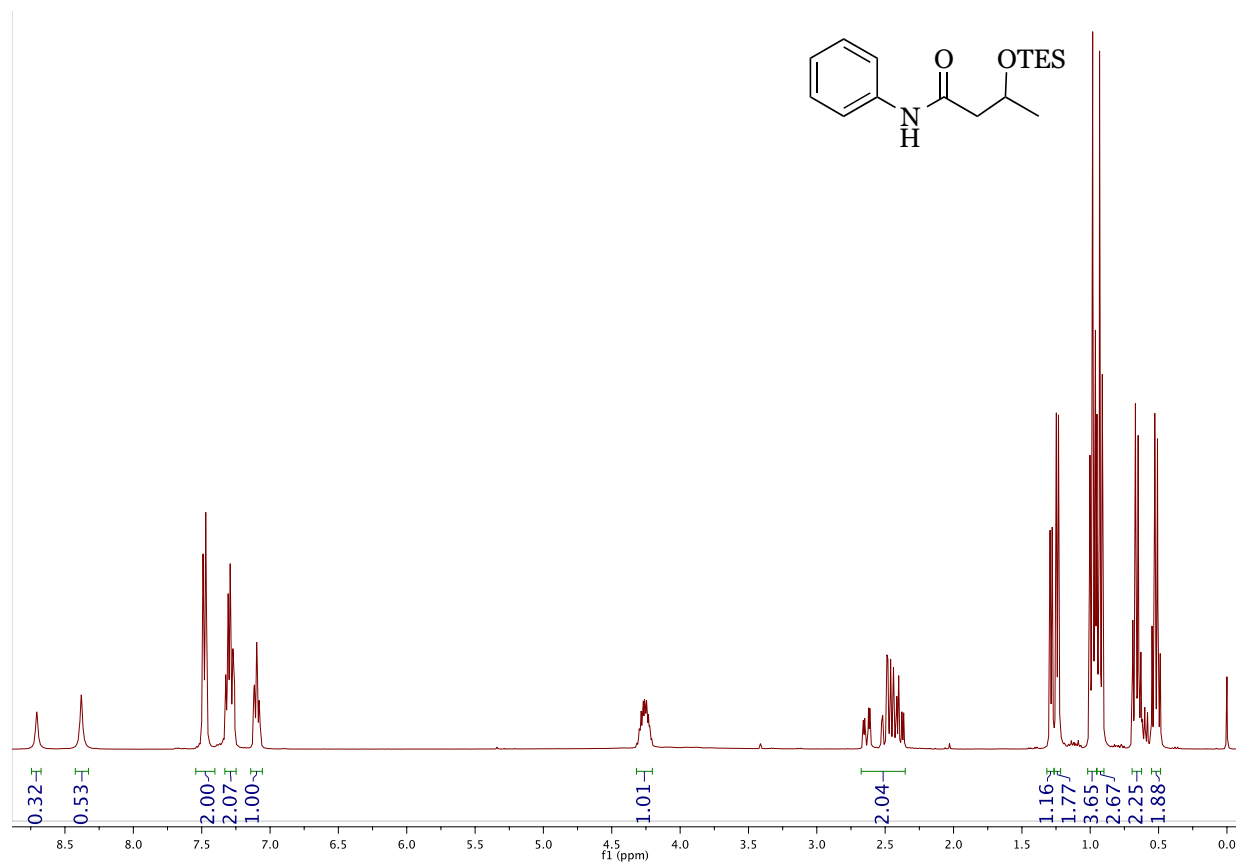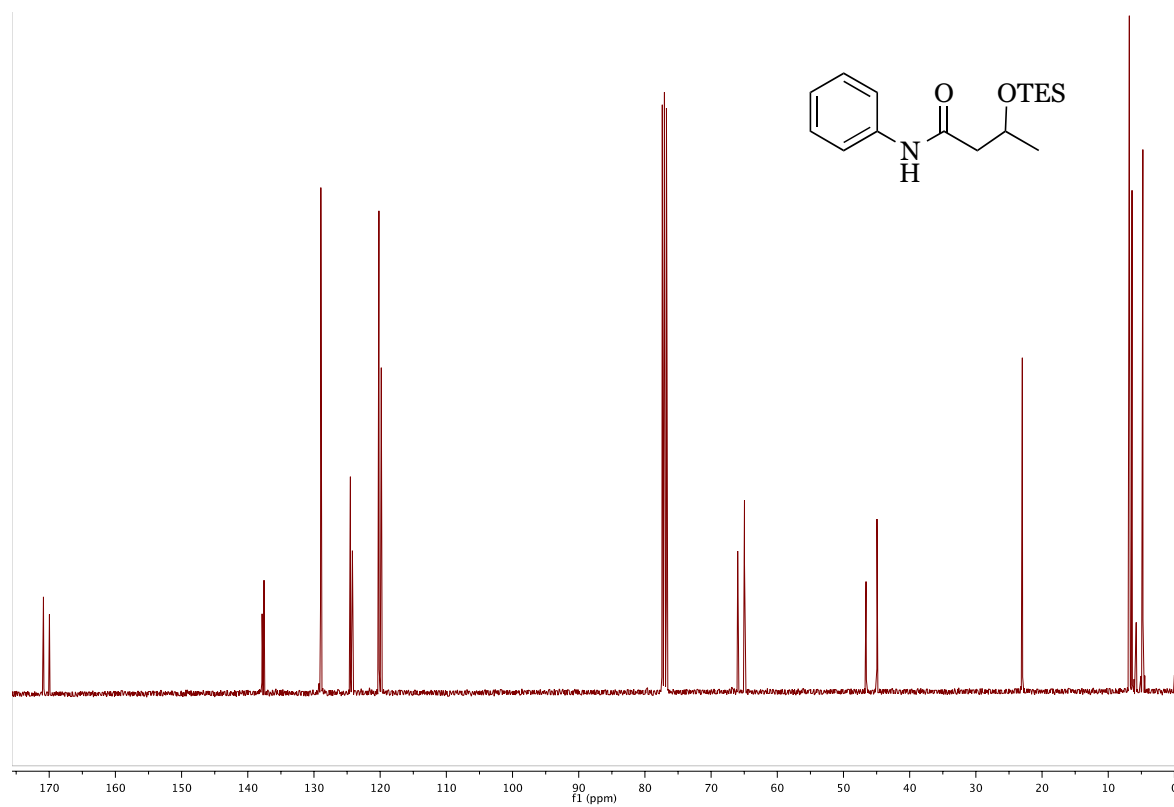

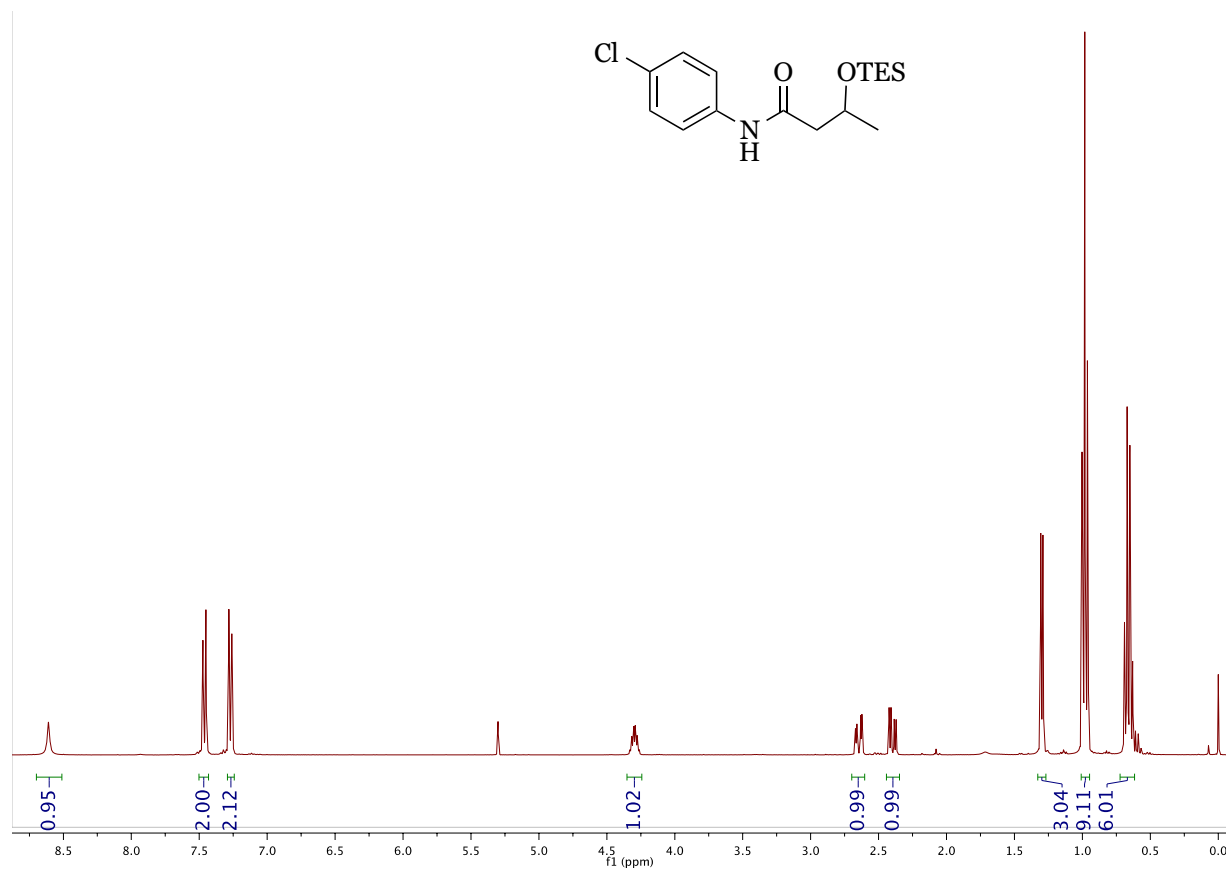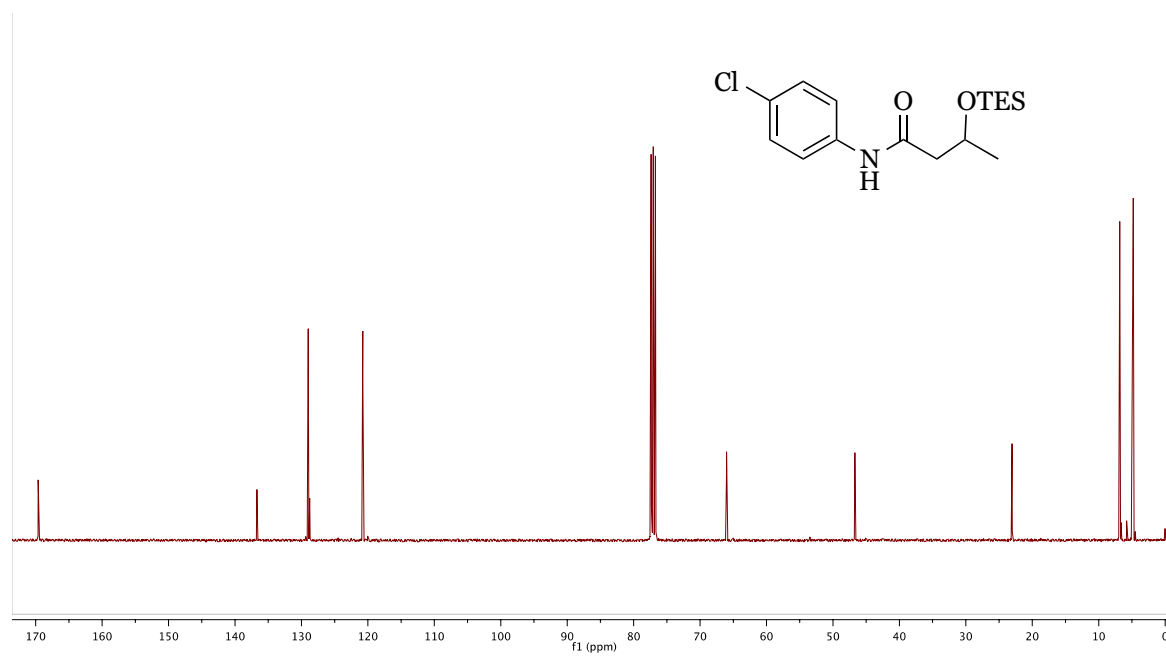

Supplement: c6ob00127k1.pdf [file c6ob00127k1.pdf]
